# Supplementary material for: Knowledge, Attitudes, Risk Perception, Preparedness and Vaccine Intent of Health Care Providers towards the Nipah Virus in South India
Source: MDPI journal article supplement (doi:10.3390/tropicalmed7040056), 2022-04-06
Supplement: s1 [file s1]

**Table S1.** Comparison of the demographic variables in relation to the perception & practice.

| Demographic Variables |                | Willing to Take<br>Risk n = 106<br>(40.6) | Not Willing to<br>Take Risk n = 155<br>(59.4) | Test Statistic | p Value |
|-----------------------|----------------|-------------------------------------------|-----------------------------------------------|----------------|---------|
| Age in years          | Mean ± sd      | 30.29±11.41                               | 30.66±9.75                                    | 0.277          | 0.782   |
| Gender                | Males n (%)    | 36 (34)                                   | 55 (35.5)                                     | 0.085          | 0.771   |
|                       | Females n (%)  | 70 (66)                                   | 99 (63.9)                                     |                |         |
| Marital Status        | Married n (%)  | 49 (46.2)                                 | 77 (49.7)                                     | 0.421          | 0.516   |
|                       | Single n (%)   | 57 (53.8)                                 | 76 (49.0)                                     |                |         |
| Type of practice      | Private n (%)  | 14 (13.2)                                 | 13 (8.4)                                      | 2.55           | 0.279   |
|                       | Academic n (%) | 92 (86.8)                                 | 142 (91.6)                                    |                |         |
| Practice Location     | Urban n (%)    | 79 (74.5)                                 | 119 (76.8)                                    | 0.393          | 0.821   |
|                       | Rural n (%)    | 27 (25.5)                                 | 34 (21.9)                                     |                |         |
| Years of Practice     | Mean ± sd      | 5.38 ± 7.71                               | 4.26 ± 5.57                                   | 1.34           | 0.182   |

\* indicates significance \*\* indicates highly significance sd indicates standard deviation.
